# Supplementary figures and images for: Predictive Value of Preoperative Serum Prealbumin Levels for Postoperative Complications and Survival Outcomes in Patients Undergoing Surgery for Malignant Bowel Obstruction: A Comprehensive Analysis
Source: Research Square preprint supplement (doi:10.21203/rs.3.rs-4370885/v1), 2024-05-15

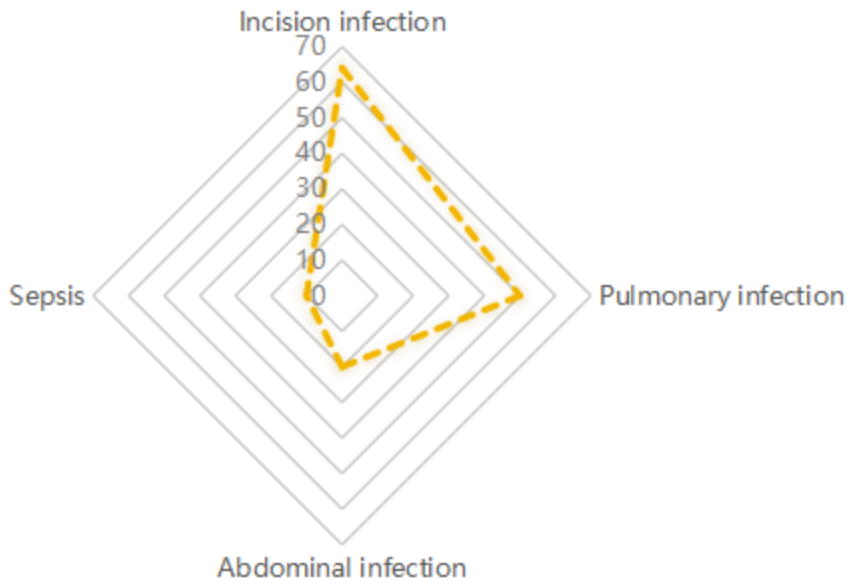

Supplementary Fig.S1 Distribution of infectious complications

Supplement: Supplementary file 1 [file 834dc822316ce370e38dd122.pdf]
